# Supplementary material for: Synthesis and characterization of cobalt(iii) cyanide complexes: cobalt participation in the decomposition of radical anion of TCNQ
Source: Royal Society of Chemistry journal article supplement (doi:10.1039/c2ce26095f), 2012-01-01
Supplement: c2ce26095f.pdf [file c2ce26095f.pdf]

## Supplementary information

### **Synthesis and Characterization of Cobalt(III) Cyanide Complexes: Cobalt Participate in the Decomposition of Radical Anion of TCNQ**

**Chun-Hong Tan<sup>a,b</sup>, Xiao Ma<sup>a,b</sup>, Qi-Long Zhu<sup>a,b</sup>, Yi-Hui Huang<sup>a,b</sup>, Yue-Hong Wen<sup>a</sup>,  
Sheng-Min Hu<sup>a</sup>, Tian-Lu Sheng<sup>a,\*</sup> and Xin-Tao Wu**

<sup>a</sup> State Key Laboratory of Structure Chemistry, Fujian Institute of Research on the  
Structure of Matter, Chinese Academy of Sciences, Fuzhou, 350002, China.

<sup>b</sup> Graduate School of the Chinese Academy of Sciences, Beijing, 100049, China.

Corresponding author:

E-mail: tsheng@fjirsm.ac.cn.

Tel: +86-591-83719238; Fax: +86-591-83719238

**Table S1.** Selected bond lengths (Å) and angles (°) for **1**.

|                  |            |                  |           |
|------------------|------------|------------------|-----------|
| N(1)-Co(1)       | 1.892(3)   | C(21)-Co(1)      | 1.932(4)  |
| N(2)-Co(1)       | 1.894(3)   | C(22)-Co(1)      | 1.941(4)  |
| O(1)-Co(1)       | 1.916(3)   | O(2)-Co(1)       | 1.911(3)  |
| C(21)-K(1)#1     | 2.989(4)   | O(2)-K(1)        | 2.709(3)  |
| C(22)-K(1)       | 3.094(4)   | O(2)-K(1)#1      | 3.333(3)  |
| N(3)-K(1)#2      | 2.739(4)   | K(1)-N(3)#3      | 2.739(4)  |
| N(3)-K(1)#1      | 3.050(4)   | K(1)-O(1)#4      | 2.788(3)  |
| N(4)-K(1)        | 3.308(5)   | K(1)-C(21)#4     | 2.989(4)  |
| O(1)-K(1)#1      | 2.788(3)   | K(1)-N(3)#4      | 3.050(4)  |
| O(1)-K(1)        | 2.974(3)   | K(1)-O(2)#4      | 3.333(3)  |
| N(1)-Co(1)-O(2)  | 95.10(12)  | N(2)-Co(1)-C(21) | 88.95(15) |
| N(2)-Co(1)-O(2)  | 177.99(13) | O(2)-Co(1)-C(21) | 89.57(15) |
| N(1)-Co(1)-O(1)  | 178.66(12) | O(1)-Co(1)-C(21) | 91.41(14) |
| N(2)-Co(1)-O(1)  | 95.08(13)  | N(1)-Co(1)-C(22) | 90.30(15) |
| O(2)-Co(1)-O(1)  | 83.60(11)  | N(2)-Co(1)-C(22) | 89.63(15) |
| N(1)-Co(1)-C(21) | 88.87(14)  | O(2)-Co(1)-C(22) | 91.86(14) |
| O(1)-Co(1)-C(22) | 89.45(14)  |                  |           |

Symmetry transformations used to generate equivalent atoms:  
#1 x, -y+3/2, z-1/2    #2 x, y, z-1    #3 x, y, z+1    #4 x, -y+3/2, z+1/2

**Table S2.** Selected bond lengths (Å) and angles (°) for **1S**.

|                                                                   |           |                   |           |
|-------------------------------------------------------------------|-----------|-------------------|-----------|
| Co(1)-N(1)                                                        | 1.887(7)  | Co(2)-N(3)        | 1.902(6)  |
| Co(1)-N(2)                                                        | 1.893(6)  | Co(2)-N(4)        | 1.904(6)  |
| Co(1)-C(21)                                                       | 1.916(9)  | Co(2)-O(4)        | 1.907(6)  |
| Co(1)-O(2)                                                        | 1.912(6)  | Co(2)-O(3)        | 1.913(6)  |
| Co(1)-O(1)                                                        | 1.915(6)  | Co(2)-C(44)       | 1.915(12) |
| Co(1)-C(22)                                                       | 1.931(11) | Co(2)-C(45)       | 1.974(11) |
| K(2)-N(7)                                                         | 2.647(11) | K(1)-C(21)        | 3.273(9)  |
| K(2)-O(3)#4                                                       | 2.793(8)  | K(1)-O(2)#6       | 3.343(7)  |
| K(2)-O(4)#4                                                       | 2.791(7)  | O(2)-K(1)#3       | 3.343(7)  |
| K(2)-N(7)#5                                                       | 2.950(10) | O(1)-K(1)#3       | 3.232(7)  |
| K(2)-C(44)#5                                                      | 3.011(9)  | O(4)-K(2)#1       | 2.791(7)  |
| K(2)-O(4)#5                                                       | 3.150(7)  | O(4)-K(2)#2       | 3.150(7)  |
| K(2)-C(45)#4                                                      | 3.226(8)  | O(3)-K(2)#1       | 2.793(8)  |
| K(2)-O(3)#5                                                       | 3.338(8)  | O(3)-K(2)#2       | 3.338(8)  |
| K(1)-N(5)#4                                                       | 2.699(11) | N(7)-K(2)#2       | 2.950(10) |
| K(1)-O(2)                                                         | 2.732(7)  | N(5)-K(1)#1       | 2.699(11) |
| K(1)-O(1)                                                         | 2.834(8)  | N(5)-K(1)#3       | 2.945(11) |
| K(1)-N(5)#6                                                       | 2.945(11) | C(45)-K(2)#1      | 3.226(8)  |
| K(1)-C(22)#6                                                      | 2.998(9)  | C(44)-K(2)#2      | 3.011(9)  |
| K(1)-O(1W)                                                        | 3.156(19) | C(22)-K(1)#3      | 2.998(9)  |
| K(1)-O(1)#6                                                       | 3.232(7)  |                   |           |
| N(1)-Co(1)-N(2)                                                   | 87.0(3)   | N(3)-Co(2)-N(4)   | 85.5(3)   |
| N(1)-Co(1)-C(21)                                                  | 89.8(4)   | N(3)-Co(2)-O(4)   | 179.1(3)  |
| N(2)-Co(1)-C(21)                                                  | 90.2(3)   | N(4)-Co(2)-O(4)   | 95.3(2)   |
| N(1)-Co(1)-O(2)                                                   | 177.5(3)  | N(3)-Co(2)-O(3)   | 96.2(3)   |
| N(2)-Co(1)-O(2)                                                   | 94.7(3)   | N(4)-Co(2)-O(3)   | 176.8(3)  |
| C(21)-Co(1)-O(2)                                                  | 92.0(3)   | O(4)-Co(2)-O(3)   | 83.0(2)   |
| N(1)-Co(1)-O(1)                                                   | 94.6(3)   | N(3)-Co(2)-C(44)  | 89.7(4)   |
| N(2)-Co(1)-O(1)                                                   | 178.2(2)  | N(4)-Co(2)-C(44)  | 86.9(4)   |
| C(21)-Co(1)-O(1)                                                  | 90.7(3)   | O(4)-Co(2)-C(44)  | 90.7(4)   |
| O(2)-Co(1)-O(1)                                                   | 83.7(3)   | O(3)-Co(2)-C(44)  | 90.4(4)   |
| N(1)-Co(1)-C(22)                                                  | 88.7(3)   | N(3)-Co(2)-C(45)  | 88.7(3)   |
| N(2)-Co(1)-C(22)                                                  | 87.6(3)   | N(4)-Co(2)-C(45)  | 92.3(3)   |
| C(21)-Co(1)-C(22)                                                 | 177.4(4)  | O(4)-Co(2)-C(45)  | 90.9(3)   |
| O(2)-Co(1)-C(22)                                                  | 89.5(3)   | O(3)-Co(2)-C(45)  | 90.5(3)   |
| O(1)-Co(1)-C(22)                                                  | 91.6(3)   | C(44)-Co(2)-C(45) | 178.3(4)  |
| Symmetry transformations used to generate equivalent:             |           |                   |           |
| #1 x, y+1, z #2 -x+1, y+1/2, -z #3 -x+2, y+1/2, -z+1 #4 x, y-1, z |           |                   |           |
| #5 -x+1, y-1/2, -z #6 -x+2, y-1/2, -z+1                           |           |                   |           |

**Table S3.** Selected bond lengths (Å) and angles (°) for **1R**.

|                   |           |                   |           |
|-------------------|-----------|-------------------|-----------|
| Co(1)-N(1)        | 1.897(5)  | Co(2)-N(3)        | 1.885(5)  |
| Co(1)-O(1)        | 1.905(4)  | Co(2)-N(4)        | 1.892(5)  |
| Co(1)-O(2)        | 1.915(4)  | Co(2)-O(3)        | 1.911(5)  |
| Co(1)-N(2)        | 1.908(5)  | Co(2)-C(44)       | 1.920(9)  |
| Co(1)-C(22)       | 1.919(8)  | Co(2)-O(4)        | 1.918(5)  |
| Co(1)-C(21)       | 1.925(7)  | Co(2)-C(45)       | 1.950(9)  |
| K(1)-N(5)#1       | 2.720(8)  | K(2)-C(45)#1      | 3.228(7)  |
| K(1)-O(2)         | 2.748(5)  | K(2)-O(4)#4       | 3.228(5)  |
| K(1)-O(1)         | 2.841(5)  | C(22)-K(1)#3      | 3.014(7)  |
| K(1)-N(5)#2       | 2.992(8)  | C(44)-K(2)#5      | 2.967(7)  |
| K(1)-C(22)#2      | 3.014(7)  | C(45)-K(2)#6      | 3.228(7)  |
| K(1)-O(1)#2       | 3.040(5)  | O(1)-K(1)#3       | 3.040(5)  |
| K(1)-C(21)        | 3.280(7)  | O(3)-K(2)#6       | 2.799(5)  |
| K(2)-N(7)         | 2.678(8)  | O(3)-K(2)#5       | 3.119(5)  |
| K(2)-O(3)#1       | 2.799(5)  | O(4)-K(2)#6       | 2.795(5)  |
| K(2)-O(4)#1       | 2.795(5)  | O(4)-K(2)#5       | 3.228(5)  |
| K(2)-N(7)#4       | 2.942(8)  | N(5)-K(1)#6       | 2.720(8)  |
| K(2)-C(44)#4      | 2.967(7)  | N(5)-K(1)#3       | 2.992(8)  |
| K(2)-O(3)#4       | 3.119(5)  | N(7)-K(2)#5       | 2.942(8)  |
| N(1)-Co(1)-O(1)   | 95.2(2)   | N(3)-Co(2)-N(4)   | 86.1(2)   |
| N(1)-Co(1)-O(2)   | 178.0(2)  | N(3)-Co(2)-O(3)   | 176.8(2)  |
| O(1)-Co(1)-O(2)   | 83.98(19) | N(4)-Co(2)-O(3)   | 95.6(2)   |
| N(1)-Co(1)-N(2)   | 86.2(2)   | N(3)-Co(2)-C(44)  | 87.2(3)   |
| O(1)-Co(1)-N(2)   | 177.4(2)  | N(4)-Co(2)-C(44)  | 91.0(3)   |
| O(2)-Co(1)-N(2)   | 94.5(2)   | O(3)-Co(2)-C(44)  | 90.1(3)   |
| N(1)-Co(1)-C(22)  | 87.9(3)   | N(3)-Co(2)-O(4)   | 96.1(2)   |
| O(1)-Co(1)-C(22)  | 90.6(3)   | N(4)-Co(2)-O(4)   | 177.2(2)  |
| O(2)-Co(1)-C(22)  | 90.2(3)   | O(3)-Co(2)-O(4)   | 82.22(19) |
| N(2)-Co(1)-C(22)  | 87.3(3)   | C(44)-Co(2)-O(4)  | 90.7(3)   |
| N(1)-Co(1)-C(21)  | 90.3(3)   | N(3)-Co(2)-C(45)  | 92.8(3)   |
| O(1)-Co(1)-C(21)  | 91.3(2)   | N(4)-Co(2)-C(45)  | 86.5(3)   |
| O(2)-Co(1)-C(21)  | 91.6(3)   | O(3)-Co(2)-C(45)  | 89.9(3)   |
| N(2)-Co(1)-C(21)  | 90.8(3)   | C(44)-Co(2)-C(45) | 177.5(3)  |
| C(22)-Co(1)-C(21) | 177.5(3)  | O(4)-Co(2)-C(45)  | 91.7(3)   |

Symmetry transformations used to generate equivalent atoms:

#1 x, y+1, z #2 -x, y+1/2, -z+1 #3 -x, y-1/2, -z+1 #4 -x+1, y+1/2, -z+2

#5 -x+1, y-1/2, -z+2 #6 x, y-1, z

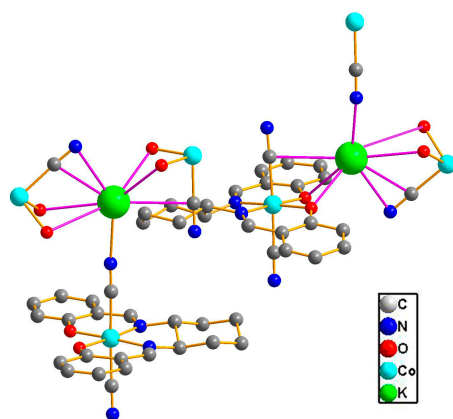

**Figure S1.** Asymmetric unit of complex **1R**, with some additional symmetry-equivalent atoms included to complete the coordination spheres around the metal atoms.

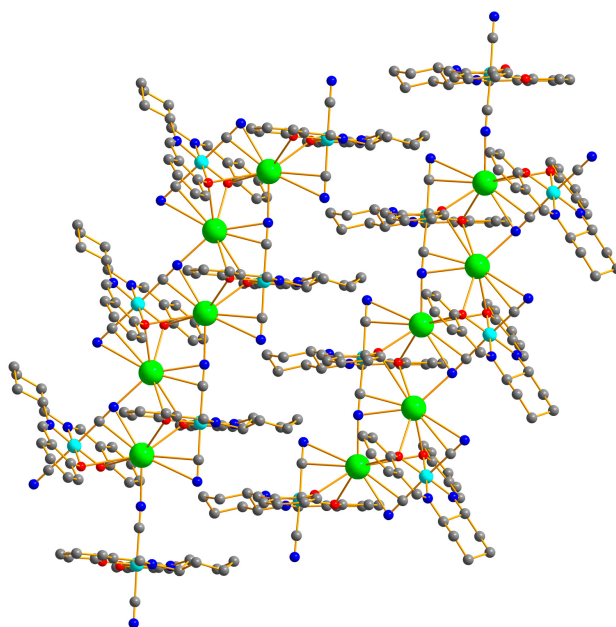

**Figure S2** view of coordination chain in complex **1R** (Ni turquoise, K green, O red, N blue, C gray).

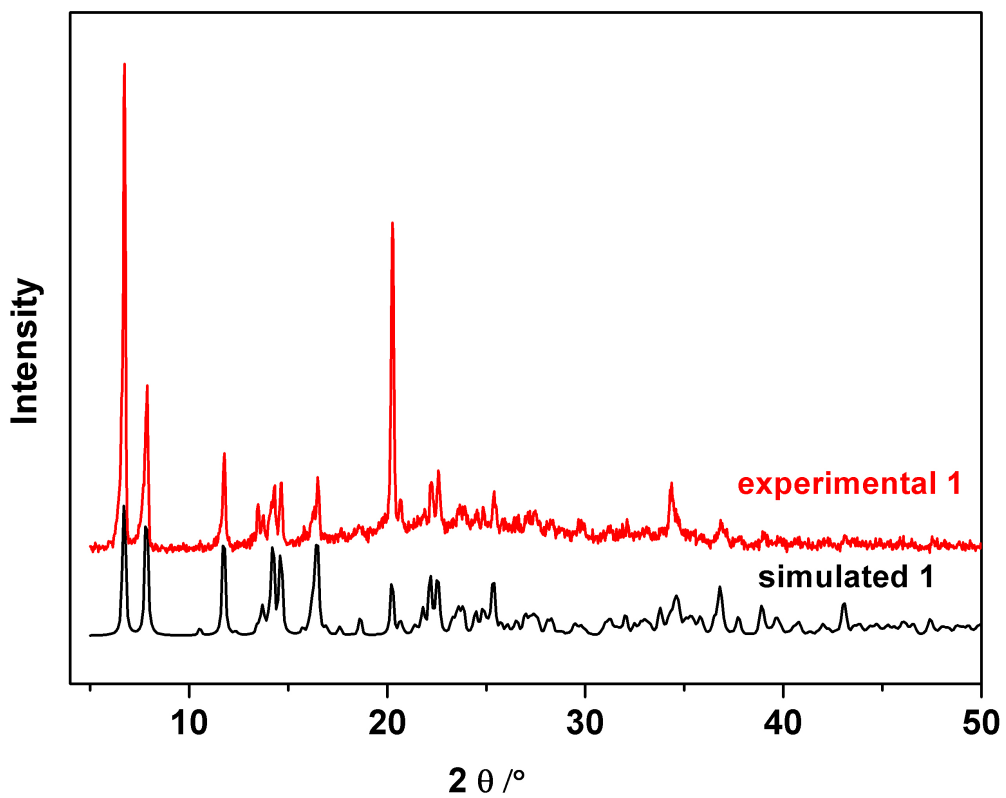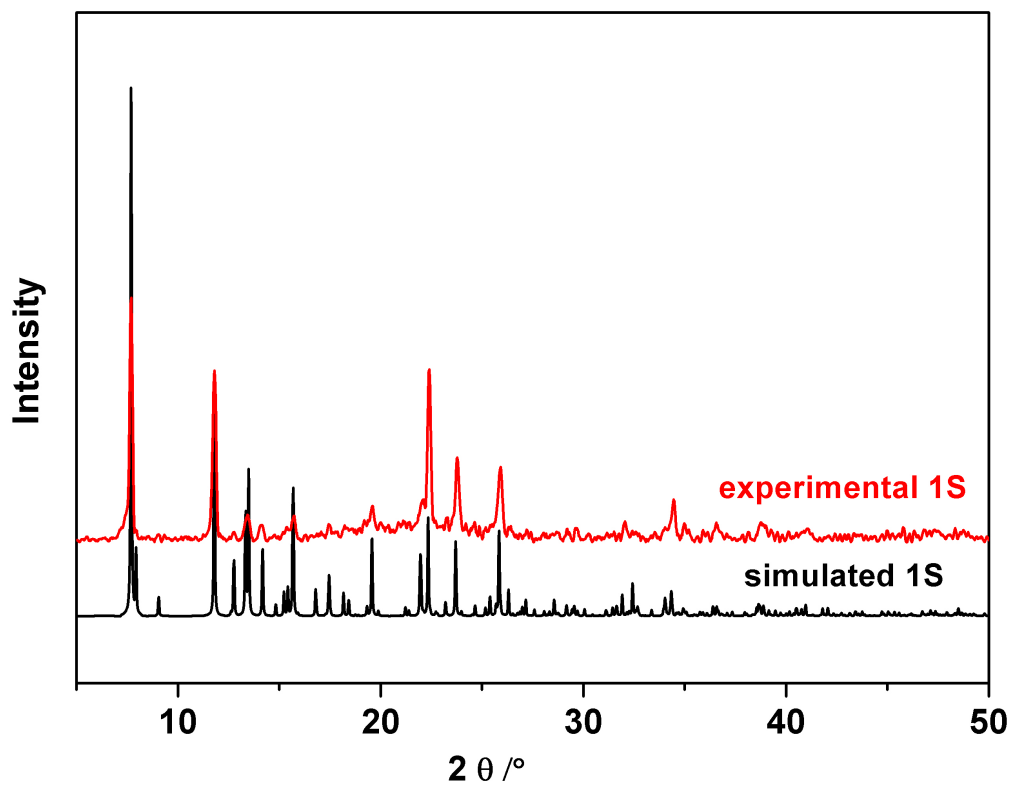

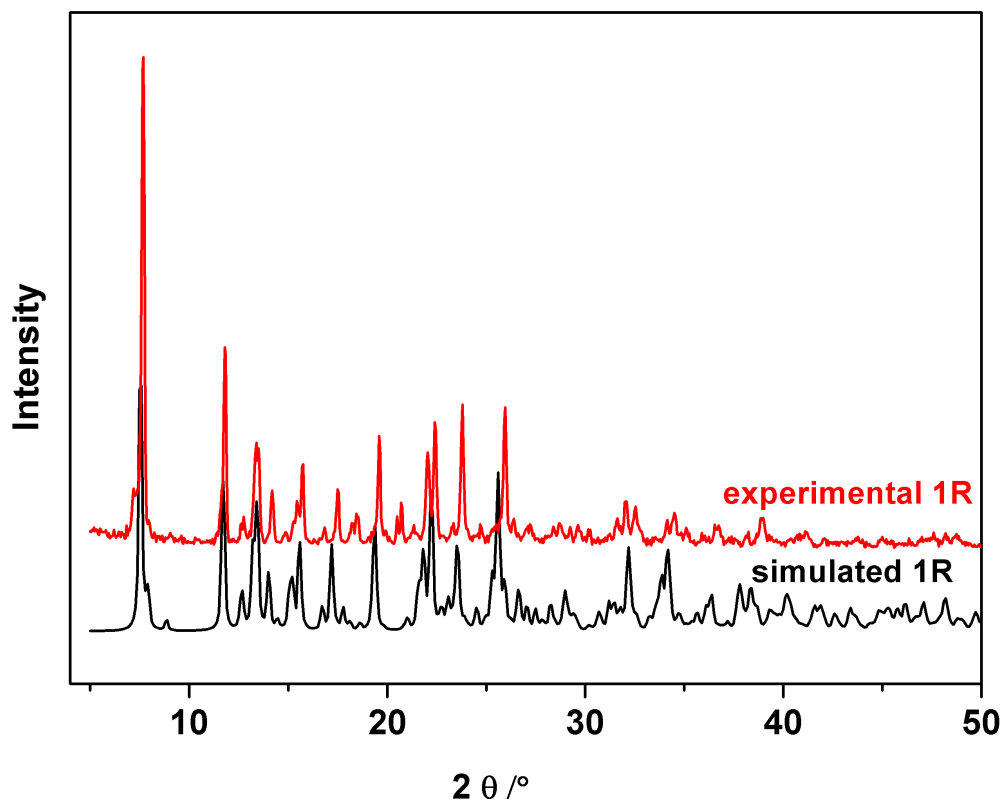

**Figure S3.** The experimental and simulated powder XRD diagrams of **1**, **1S** and **1R**.

**Notes:** The experimental powdered X-ray diffraction patterns of **1**, **1S** and **1R** agree well with the simulated ones based on the single-crystal X-ray data, indicating that they are in a pure phase.
